# Supplementary material for: Environmental changes, climate and anthropogenic impact in southern-eastern Tunisia during the last 8 kyr
Source: Copernicus journal article supplement (doi:10.5194/cp-2016-25), 2016-02-29
Supplement: Supplementary file [file cp-2016-25-AC1-supplement.pdf]

- The authors say: Vegetation is sparse and adapted to the arid conditions with psammophyte shrubs (*Calligonum* sp., *Ephedra alata* subsp. *alenda* and *Retama raetam*) and desert herbaceous plants such as *Amaranthaceae* (*Cornulaca monacantha*, *Traganum nudatum*), *Boraginaceae* (*Echium* sp., *Moltkiopsis ciliata*), *Zygophyllaceae* (*Fagonia* sp., *Nitraria retusa*), *Brassicaceae* (*Henophyton deserti*) and *Euphorbiaceae* (*Euphorbia guyoniana*). Authors must be careful: all these species are no herbaceous, but woody plants.

This has been corrected by mentioning only the psammophyte shrubs as forming the main vegetation of the desert. The ecology and plant types of these species follow Le Houérou (1959) and Pottier-Alapetite (1979, 1981).

- The significant increase in *Artemisia* (wormwood) between 1.1 and 0.8 ka (850 – 1150 AD) is linked to intensive pastoral activity, associated with heightened interannual and/or seasonal climatic instability. The appearance of *Artemisia* is newer at the vegetation of southern Tunisia. Moreover, I invite the authors to read the synthesis the Houérou (1959 & 1969), already mentioned in this work and especially Le Houérou (1994). According to The Houérou, the occurrence of *Artemisia* is very recent, and linked to contemporary and actual human activity. According to this author, as well as all recent studies, the occurrence of *Artemisia herba-alba* is linked to the actual degradation of the steppe of Alfa, which exists on loamy soils, and Glacis. On the other hand, the appearance of *Artemisia campestris* is related to actual clearing steppes *Rhanterium suaveolens*, which exists on sandy substrate of the Djefara plain of the Tunisian south.

We thank the referee for these constructive remarks. Current studies of the dynamics of steppic vegetation associations in Tunisia are important in order to throw light on the Holocene records and to explain certain changes in the vegetation structure such as those observed in fossil pollen spectra. The elements suggested by the referee have been inserted into our discussion on the dynamics of *Artemisia* during the Holocene, particularly in relation to the replacement of the *Rhanterium suaveolens* steppe by the *Artemisia campestris* steppe in the Jeffara (Chaieb and Zaïfour, 2000; Genin et al. 2006).

However, notwithstanding the complementarity between contemporary botanical studies and palaeoecological data produced by pollen analysis, as for example in the case of *A. campestris* and *Rhanterium suaveolens*, we feel that a significant difference exists in approaching vegetation dynamics within a temporal perspective at the scale of the Holocene through pollen analyses. Thus, for *Artemisia*, the pollen data from Sebkhâ Boujmel indicate a relatively early and progressive development, closely linked to anthropic activity, even though other factors could also have played a role in this development. These data do not support the claim for an exclusively contemporary and very recent development. On the contrary, it is important to place the recent development of *Artemisia* within a long-term dynamic which is also apparent in other pollen diagrams in Tunisia (Brun, 1983 ; Brun and Rouvillois-Brigol, 1985).

- *Salvadora persica* is a species of the Middle East and the Persian Gulf, and has never existed in North Africa.

*Salvadora Persica* is mentioned with reference to the work carried out by Giraudi and colleagues (2013) who report the occurrence of pollen of this species in the nearby Libyan Jeffara to the south. This species is currently reported from many Saharan mountains such as Hoggar and Tassili (e.g. Ozenda, 2004, p.366). As regards the Holocene palaeo-botanical records, besides the data from the Libyan Jeffara, both pollen (Mercuri, 2008) and charcoal (Neumann and Uebel, 2001) of *Salvadora persica* are reported from Holocene archaeological sites in the Libyan Sahara.

- Several scientific plant species names are written with errors. example, *Haloxylon scoparium* not *Holoxylon scoparium* in the legend to Figure 1. The authors employ often old scientific nomenclature. I invite them to review the names of species according to the new nomenclature, proposed by Le Floch, Boulos & Vela (2010). Finally, authors should consider these remarks on the current flora to claim the publication of this work.

All botanical species names in the text and figure captions have been checked for typing mistakes and have been duly corrected in accordance with Le Floch et al., 2010. The latter reference has been added to the paper and inserted in the text (P.3, L.25). However, we still refer to *Artemisia herba-alba* (p.15,l.22) in order to make it easier for readers to follow this work in respect to previous published data and studies, and also because the evidence for *Artemisia saharae* is not yet confirmed with certitude in Tunisia (Le Floch et al. 2010).

#### References:

Chaieb, M., and Zaâfour, M. S.: L'élevage extensif, facteur écologique primordial de la transformation phytosociologique du cortège floristique en milieu steppique tunisien, in: Rupture : nouveaux enjeux, nouvelles fonctions, nouvelle image de l'élevage sur parcours, edited by: Bourbouze, A., and Qarro, M., CIHEAM, Montpellier, 217-222, 2000.

Le Floch, E., Boulos, L., and Vela, E.: Catalogue synonymique commenté de la Flore de Tunisie, Ministère de l'Environnement et du Développement durable - Banque Nationale de Gènes, Montpellier-Tunis, 500 pp., 2010.

Mercuri, A. M.: Human influence, plant landscape evolution and climate inferences from the archaeobotanical records of the Wadi Teshuinat area (Libyan Sahara), *Journal of Arid Environments*, 72, 1950-1967, <http://dx.doi.org/10.1016/j.jaridenv.2008.04.008>, 2008.

Neumann, K., and Uebel, D.: The cold Early Holocene in the Acacus: Evidence from charred wood, in: Uan Tabu in the Settlement History of the Libyan Sahara, edited by: Garcea, E. A. A., *Arid Zone Archaeology – Monographs*, 2, All'Insegna del Giglio, Firenze, 211–213, 2001.
