# Supplementary material for: Environmental changes, climate and anthropogenic impact in southern-eastern Tunisia during the last 8 kyr
Source: Copernicus journal article supplement (doi:10.5194/cp-2016-25), 2016-02-29
Supplement: Supplementary file [file cp-2016-25-AC3-supplement.pdf]

Dear Editor,

The authors are grateful for the constructive comments and corrections received from Anonymous Referees 1 and 2, which will allow us to improve the quality of the manuscript.

The following are our answers to the reviewers' specific comments, as well as the modifications of the manuscript.

Regards,

S. Jaouadi

### **Anonymous Referee #1**

- The authors say: Vegetation is sparse and adapted to the arid conditions with psammophyte shrubs (*Calligonum* sp., *Ephedra alata* subsp. *alenda* and *Retama raetam*) and desert herbaceous plants such as *Amaranthaceae* (*Cornulaca monacantha*, *Traganum nudatum*), *Boraginaceae* (*Echium* sp., *Moltkiopsis ciliata*), *Zygophyllaceae* (*Fagonia* sp., *Nitraria retusa*), *Brassicaceae* (*Henophyton deserti*) and *Euphorbiaceae* (*Euphorbia guyoniana*). Authors must be careful: all these species are no herbaceous, but woody plants.

This has been corrected by mentioning only the psammophyte shrubs as forming the main vegetation of the desert. The ecology and plant types of these species follow Le Houérou (1959) and Pottier-Alapetite (1979, 1981).

- The significant increase in *Artemisia* (wormwood) between 1.1 and 0.8 ka (850 – 1150 AD) is linked to intensive pastoral activity, associated with heightened interannual and/or seasonal climatic instability. The appearance of *Artemisia* is newer at the vegetation of southern Tunisia. Moreover, I invite the authors to read the synthesis the Houérou (1959 & 1969), already mentioned in this work and especially Le Houérou (1994). According to The Houérou, the occurrence of *Artemisia* is very recent, and linked to contemporary and actual human activity. According to this author, as well as all recent studies, the occurrence of *Artemisia herba-alba* is linked to the actual degradation of the steppe of Alfa, which exists on loamy soils, and Glacis. On the other hand, the appearance of *Artemisia campestris* is related to actual clearing steppes *Rhanterium suaveolens*, which exists on sandy substrate of the Djefara plain of the Tunisian south.

We thank the referee for these constructive remarks. Current studies of the dynamics of steppe vegetation associations in Tunisia are important in order to throw light on the Holocene records and to explain certain changes in the vegetation structure such as those observed in fossil pollen spectra. The elements suggested by the referee have been inserted into our discussion on the dynamics of *Artemisia* during the Holocene, particularly in relation to the replacement of the *Rhanterium suaveolens* steppe by the *Artemisia campestris* steppe in the Jeffara (Chaieb and Zaâfour, 2000; Genin et al. 2006).

However, notwithstanding the complementarity between contemporary botanical studies and palaeoecological data produced by pollen analysis, as for example in the case of *A. campestris* and *Rhanterium suaveolens*, we feel that a significant difference exists in approaching vegetation dynamics within a temporal perspective at the scale of the Holocene through pollen analyses. Thus, for *Artemisia*, the pollen data from Sebkhâ Boujmel indicate a relatively early and progressive development, closely linked to anthropic activity, even though other factors could also have played a

role in this development. These data do not support the claim for an exclusively contemporary and very recent development. On the contrary, it is important to place the recent development of *Artemisia* within a long-term dynamic which is also apparent in other pollen diagrams in Tunisia (Brun, 1983 ; Brun and Rouvillois-Brigol, 1985).

- *Salvadora persica* is a species of the Middle East and the Persian Gulf, and has never existed in North Africa.

*Salvadora Persica* is mentioned with reference to the work carried out by Giraudi and colleagues (2013) who report the occurrence of pollen of this species in the nearby Libyan Jeffara to the south. This species is currently reported from many Saharan mountains such as Hoggar and Tassili (e.g. Ozenda, 2004, p.366). As regards the Holocene palaeo-botanical records, besides the data from the Libyan Jeffara, both pollen (Mercuri, 2008) and charcoal (Neumann and Uebel, 2001) of *Salvadora persica* are reported from Holocene archaeological sites in the Libyan Sahara.

- Several scientific plant species names are written with errors. example, *Haloxylon scoparium* not *Holoxylon scoparium* in the legend to Figure 1. The authors employ often old scientific nomenclature. I invite them to review the names of species according to the new nomenclature, proposed by Le Floch, Boulos & Vela (2010). Finally, authors should consider these remarks on the current flora to claim the publication of this work.

All botanical species names in the text and figure captions have been checked for typing mistakes and have been duly corrected in accordance with Le Floch et al., 2010. The latter reference has been added to the paper and inserted in the text (P.3, L.25). However, we still refer to *Artemisia herba-alba* (p.15,l.22) in order to make it easier for readers to follow this work in respect to previous published data and studies, and also because the evidence for *Artemisia saharae* is not yet confirmed with certitude in Tunisia (Le Floch et al. 2010).

## **Anonymous Referee #2**

- Radiocarbon dating: The authors state that the organic matter they dated is “of mixed origin, composed of marine planktonic/algal material and continental woody material” (p.5, l.3-4). In this case, one may wonder if correction for marine reservoir effect is appropriate – it may lead to an overcorrection of the dates? It would have been better, of course, to be able to date terrestrial macrofossils instead of bulk organic matter – but these are notoriously missing in such environments. However, for further studies, the authors may consider the possibility of picking small particles of charcoal (200-500  $\mu\text{m}$ ), which may be present in the sediment and may provide more reliable ages. This, and the general aspect of the age-depth model (Fig. 2) indicate that indeed time constrain may not be that reliable below ca. 4000 BP, and this renders it difficult to compare short-term events with other records. Although the authors take great care to emphasis this in the discussion, it may be better to acknowledge this issue by introducing more caution (e.g., by the use of ca.) when summarising the results (e.g. in the abstract).

Thank you for this remark and the suggestion about dating charcoal particles for future research. The referee’s advice has been taken on board by using “ca.” for all dates within the abstract and the paper text.

As the referee rightly points out, terrestrial organic material suitable for dating is lacking in such sediments. The presence of benthic foraminifera, the mixed origin of the dated material, and the absence of data regarding the relative percentages of planktonic/algal material and continental woody material within each sample, obliged us to correct the dates for marine reservoir effect. In all, we think that we have an acceptable chronological framework as maximum age error ranges from 1 to 2 centuries considering the error bars with or without corrections for reservoir effect. Efforts have also been made to obtain a maximum age control within the sequence by cross-checking <sup>14</sup>C dates and tephrochronological data. Unfortunately, sieving and observation under binocular microscope do not allow tephra particles to be identified, even though such material has been reported from the nearby Sebkhah Mhabeul (Marqueur et al. 2008).

- Comparison to other records: Roman period: there are actually some indications that the climate may have been colder during the Roman period in the Middle East, so the term “Roman Warm Period” may not be appropriate for the whole region. . . (e.g. Issar 2003 - Climate Changes during the Holocene and their Impact on Hydrological Systems, INTERNATIONAL HYDROLOGY SERIES, Cambridge university press).

We thank the referee for this remark highlighting the problems arising from the use of northern European terminology when dealing with climate change in other regions, especially when this terminology includes climatic indications such as “warm”. The “Roman Warm Period” does not have a global signal as an RCC with important regional differences and peculiarities (e.g. Martín-Puertas et al. 2008). Therefore, we use “Roman Warm Period” as a generic term for this climate event and refer to it within the text as a climate episode “commonly known as the Roman Warm Period (RWP)”. Based on our data, we do not yet have information as to whether this period was warm or cold and the main element that we discuss is the relative wetness of this period based on our data compared to other records from the southern Mediterranean. Therefore, we have decided to use the term “Roman Humid Period-RHP”, as done, for example, by Martín-Puertas et al. 2009 and Jiménez-Moreno et al. 2013 for southern Spain. “Roman Humid Period” seems more appropriate and consistent with our data and other southern Mediterranean records discussed in the text, such as the Middle East where a colder and more humid climate prevailed during the Roman period (Issar, 2003).

### **Other changes to the manuscript:**

- page 16, line 7: Reference to Sadori et al., 2013 is replaced by Sadori et al., 2016
- Pollen taxa name *Cornulaca-Traganum* type is corrected to *Cornulaca/Traganum*-t.
- Figure 5: Nitrophilous corrected to Nitrophilous

### References:

Chaieb, M., and Zaâfour, M. S.: L'élevage extensif, facteur écologique primordial de la transformation physiologique du cortège floristique en milieu steppique tunisien, in: Rupture : nouveaux enjeux, nouvelles fonctions, nouvelle image de l'élevage sur parcours, edited by: Bourbouze, A., and Qarro, M., CIHEAM, Montpellier, 217-222, 2000.

Issar, A. S.: Climate Changes during the Holocene and their Impact on Hydrological Systems, Cambridge University Press, 2003.

Jiménez-Moreno, G., García-Alix, A., Hernández-Corbalán, M. D., Anderson, R. S., and Delgado-Huertas, A.: Vegetation, fire, climate and human disturbance history in the southwestern Mediterranean area during the late Holocene, *Quaternary Research*, 79, 110-122, <http://dx.doi.org/10.1016/j.yqres.2012.11.008>, 2013.

Le Floc'h, E., Boulos, L., and Vela, E.: Catalogue synonymique commenté de la Flore de Tunisie, Ministère de l'Environnement et du Développement durable - Banque Nationale de Gènes, Montpellier-Tunis, 500 pp., 2010.

Martín-Puertas, C., Valero-Garcés, B. L., Brauer, A., Mata, M. P., Delgado-Huertas, A., and Dulski, P.: The Iberian–Roman Humid Period (2600–1600 cal yr BP) in the Zoñar Lake varve record (Andalucía, southern Spain), *Quaternary Research*, 71, 108-120, <http://dx.doi.org/10.1016/j.yqres.2008.10.004>, 2009.

Mercuri, A. M.: Human influence, plant landscape evolution and climate inferences from the archaeobotanical records of the Wadi Teshuinat area (Libyan Sahara), *Journal of Arid Environments*, 72, 1950-1967, <http://dx.doi.org/10.1016/j.jaridenv.2008.04.008>, 2008.

Neumann, K., and Uebel, D.: The cold Early Holocene in the Acacus: Evidence from charred wood, in: *Uan Tabu in the Settlement History of the Libyan Sahara*, edited by: Garcea, E. A. A., *Arid Zone Archaeology – Monographs*, 2, All'Insegna del Giglio, Firenze, 211–213, 2001.

Sadori, L., Giraudi, C., Masi, A., Magny, M., Ortu, E., Zanchetta, G., and Izdebski, A.: Climate, environment and society in southern Italy during the last 2000 years. A review of the environmental, historical and archaeological evidence, *Quaternary Science Reviews*, 136, 173-188, <http://dx.doi.org/10.1016/j.quascirev.2015.09.020>, 2016.
